# Supplementary material for: Liposomal formulations of anticancer copper(ii) thiosemicarbazone complexes
Source: Royal Society of Chemistry journal article supplement (doi:10.1039/d1dt02763h), 2021-01-01
Supplement: d1dt02763h1.pdf [file d1dt02763h1.pdf]

## Supporting Information

### Liposomal formulations of anticancer copper(II) thiosemicarbazone complexes

Marlene Mathuber<sup>a</sup>, Sonja Hager<sup>b,c</sup>, Bernhard K. Keppler<sup>a,c</sup>, Petra Heffeter<sup>b,c</sup> and Christian R. Kowol<sup>a,c,\*</sup>

<sup>a</sup> Institute of Inorganic Chemistry, Faculty of Chemistry, University of Vienna, Waehringer Straße 42,  
1090 Vienna, Austria

<sup>b</sup> Institute of Cancer Research and Comprehensive Cancer Center, Medical University of Vienna,  
Borschkegasse 8A, 1090 Vienna, Austria

<sup>c</sup> Research Cluster “Translational Cancer Therapy Research”, University of Vienna and Medical  
University of Vienna, 1090 Vienna, Austria

E-mail address: [christian.kowol@univie.ac.at](mailto:christian.kowol@univie.ac.at)

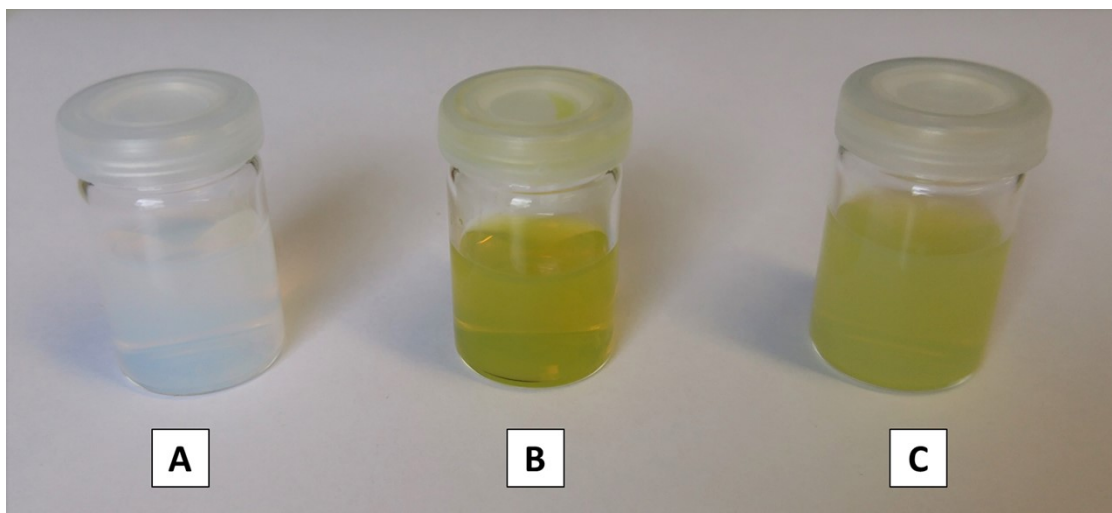

**Figure S1:** Pictures of (A) unloaded liposomes, (B) L-Cu-Tria and (C) L-Cu-COTI.

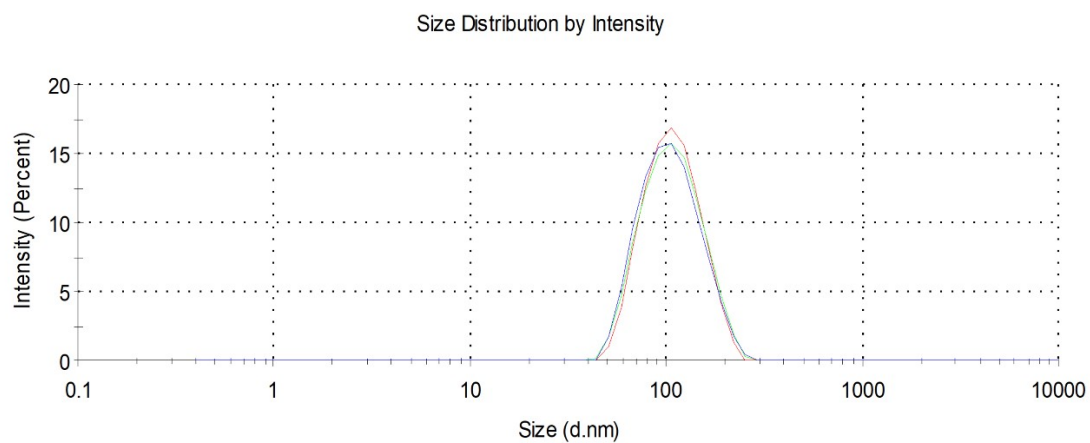

**Figure S2:** Size distribution of L-Cu-COTI (by intensity) measured by dynamic light scattering (each line represent measurements in triplicate).

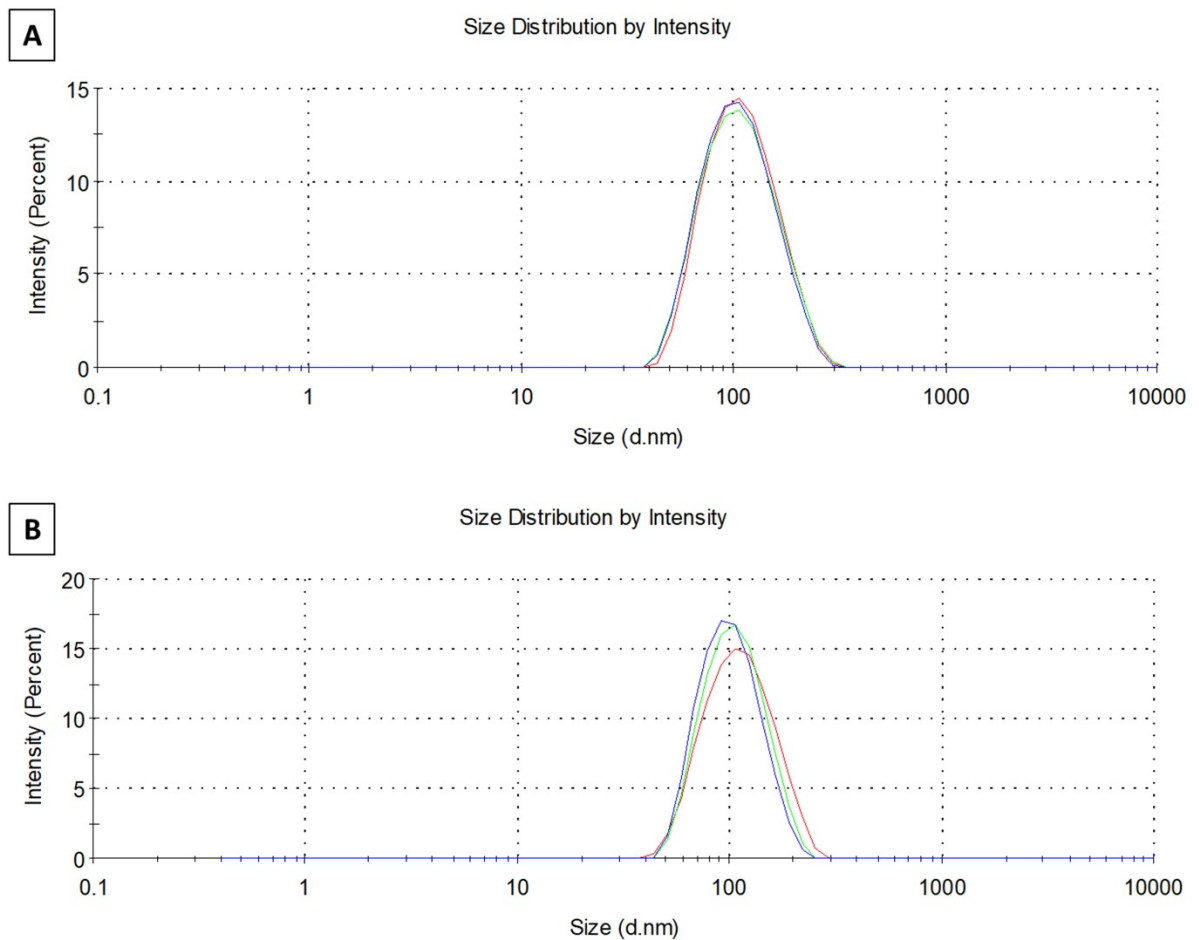

**Figure S3:** Size distribution of **L-Cu-Tria** (by intensity) measured by dynamic light scattering (each line represent measurements in triplicate). A) Directly after the second size exclusion chromatography B) after reducing the solution by approximately half of its volume.

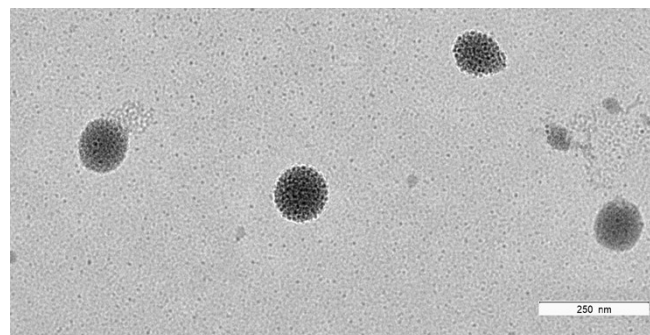

**Figure S4:** Transmission electron microscopy image of **L-Cu-Tria**; samples were prepared by negative staining with Uranylless.

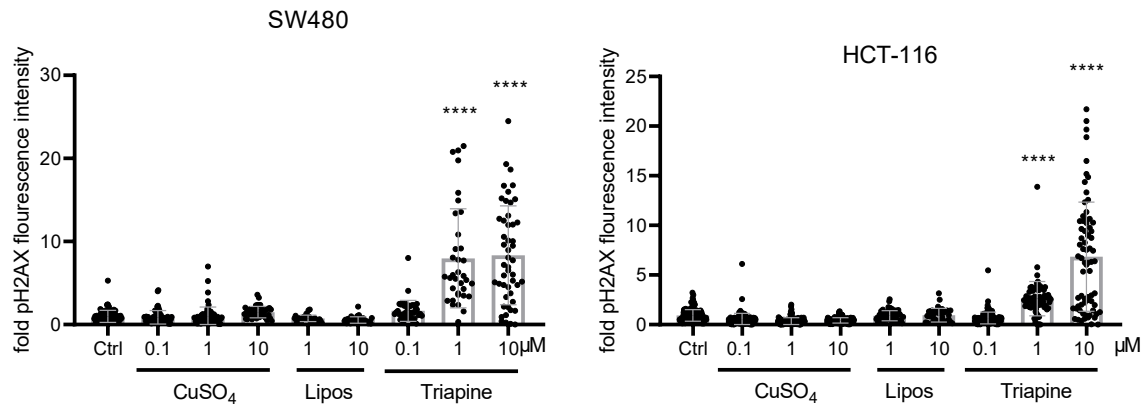

**Figure S5:** Quantification of immunofluorescence intensities in the nucleus of the DNA damage marker pH2AX in SW480 and HCT-116 cells treated with indicated concentrations of CuSO<sub>4</sub>, empty liposomes (equivalent concentration to loaded liposomes) or Triapine for 24 h. Values given are the mean fold intensities  $\pm$  SD per nucleus. Significance to control was calculated by two-way ANOVA and Dunnett's multiple comparison test (\*\*\*\*  $p < 0.0001$ ).
